# Supplementary material
Source: Springer Nature journal article supplement (https://www.springermedizin.de/resource/supplementary/12883_2009_356_MOESM1_ESM.pdf/9455220)

# Hip flexion range of motion

## A

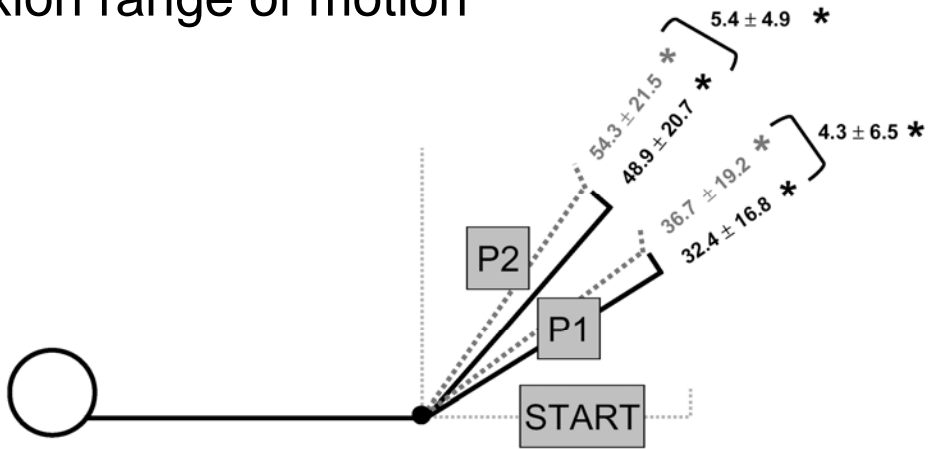

# Symptom intensity

## B

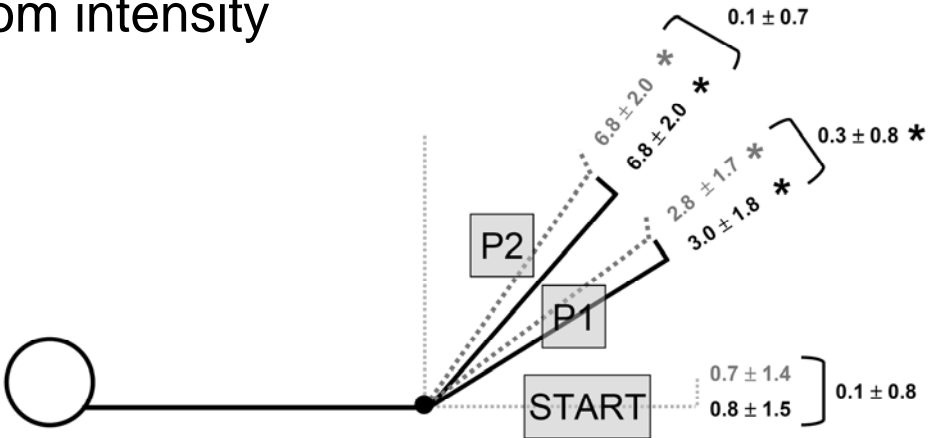

Supplement: MOESM1 [file 9455220]
